# Supplementary material for: Experimental and theoretical investigation of enhanced cold cathode emission by plasma-etched 3d array of nanotips derived from CuPc nanotube
Source: Royal Society of Chemistry journal article supplement (doi:10.1039/c4ra11298a), 2015-01-01
Supplement: c4ra11298a1.pdf [file c4ra11298a1.pdf]

## **Supporting Information**

### **Experimental and theoretical investigation of enhanced cold cathode emission by plasma-etched 3d array of nanotips derived from CuPc nanotube**

Uttam Kumar Ghorai<sup>1</sup>, Subhajit Saha<sup>1</sup>, Nilesh Mazumder<sup>2</sup>, Nirmalya S. Das<sup>1</sup>, Diptonil Banerjee<sup>1</sup>, Dipayan Sen<sup>2</sup> and Kalyan K. Chattopadhyay<sup>1,2\*</sup>

<sup>1</sup>School of Materials Science and Nanotechnology, Jadavpur University, Kolkata 700 032, India

<sup>2</sup>Thin Film & Nanoscience Laboratory, Department of Physics, Jadavpur University, Kolkata 700 032, India

## **Contents**

1. XPS survey scan of CuPc nanotips
2. FESEM image of CuPc nanotube before plasma treatment
3. FESEM image of ordered CuPc nanotips after plasma treatment

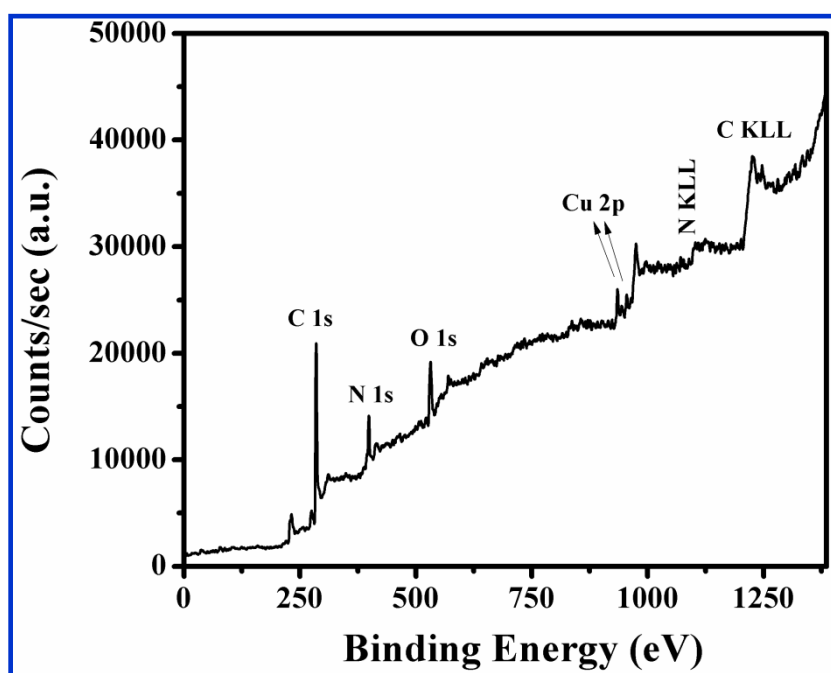

**Figure S1:** XPS survey scan of CuPc nanotips

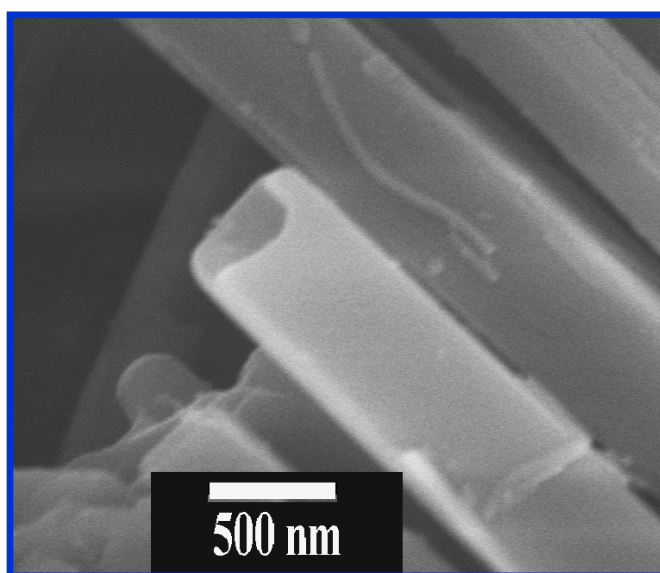

**Figure S2:** FESEM image of CuPc nanotube before plasma treatment.

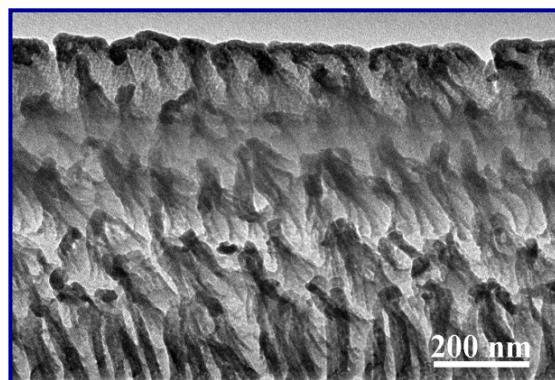

**Figure S3:** FESEM image of ordered CuPc nanotips after plasma treatment.
